# Supplementary material for: Embryonic and Neonatal Mouse Cochleae Are Susceptible to Zika Virus Infection
Source: MDPI journal article supplement (doi:10.3390/v13091823), 2021-09-14
Supplement: s1 [file s1]

Supplementary Table S1 – Summary of experimental conditions for cochlear cultures

| Group                    | Exp # | Day of explant | Days in vitro | Treatment (number of organs) |          |          |                       | Stain |      |      |        |
|--------------------------|-------|----------------|---------------|------------------------------|----------|----------|-----------------------|-------|------|------|--------|
|                          |       |                |               | Control                      | ZIKV 24h | ZIKV 48h | AB <sup>1</sup> +ZIKV | dsRNA | Myo6 | Sox2 | a-cas3 |
| A - cell types infected  |       |                |               |                              |          |          |                       |       |      |      |        |
|                          | A1    | E12.5          | 6 DIV         | 4                            |          | 4        |                       | x     | x    | x    |        |
|                          | A2    | E12.5          | 6 DIV         | 4                            |          | 4        |                       | x     | x    | x    |        |
|                          | A3    | E12.5          | 6 DIV         | 2                            | 3        |          |                       | x     | x    | x    |        |
|                          | A4    | E12.5          | 6 DIV         | 3                            | 3        |          |                       | x     | x    | x    |        |
|                          | A5    | E12.5          | 6 DIV         | 4                            | 4        |          |                       | x     | x    | x    |        |
|                          | A6    | E15.5          | 6 DIV         | 3                            |          | 3        |                       | x     | x    | x    |        |
|                          | A7    | E15.5          | 6 DIV         | 2                            | 6        |          |                       | x     | x    | x    |        |
|                          | A8    | E15.5          | 6 DIV         | 7                            | 3        |          |                       | x     | x    | x    |        |
|                          | A9    | E15.5          | 6 DIV         | 6                            | 3        |          |                       | x     | x    | x    |        |
|                          | A10   | E15.5          | 6 DIV         | 5                            | 6        |          |                       | x     | x    | x    |        |
|                          | A11   | P2             | 6 DIV         | 0                            | 2        |          |                       | x     | x    | x    |        |
|                          | A12   | P2             | 6 DIV         | 2                            | 2        |          |                       | x     | x    | x    |        |
|                          | A13   | P2             | 6 DIV         | 4                            | 4        |          |                       | x     | x    | x    |        |
| B – cell death           |       |                |               |                              |          |          |                       |       |      |      |        |
|                          | B1    | E12.5          | 3 DIV         | 2                            | 4        |          |                       | x     |      | x    | x      |
|                          | B2    | E15.5          | 6 DIV         | 2                            | 3        |          |                       | x     |      | x    | x      |
|                          | B3    | E15.5          | 3 DIV         | 4                            | 1        |          |                       | x     |      | x    | x      |
|                          | B4    | E15.5          | 3 DIV         | 3                            | 7        |          |                       | x     |      | x    | x      |
|                          | B5    | E15.5          | 3 DIV         | 4                            | 4        |          |                       | x     |      | x    | x      |
|                          | B6    | E15.5          | 3 DIV         | 5                            | 3        |          |                       | x     |      | x    | x      |
| C – virus neutralization |       |                |               |                              |          |          |                       |       |      |      |        |
|                          | C1    | E12.5          | 6 DIV         | 4                            | 3        |          | 4                     | x     | x    | x    |        |
|                          | C2    | E12.5          | 6 DIV         | 3                            | 3        |          | 2                     | x     | x    | x    |        |

AB<sup>1</sup> = antibody ZIKV-117
